# Supplementary material
Source: publisher site journal article supplement (https://www.dovepress.com/article/585311)
Supplement: Supplementary file 1 [file 585311%20Supplementary%20Materials.pdf]

Table S1. Ratings of relevance, content allocation and clarity by clinicians (n=10) and patients (n=9)

|                  |                                      | Clinicians (n=10) QUANTITATIVE |                         |         | Patients (n=9) QUALITATIVE |                     |                  | Synthesis & Adaptation                                                                                              |
|------------------|--------------------------------------|--------------------------------|-------------------------|---------|----------------------------|---------------------|------------------|---------------------------------------------------------------------------------------------------------------------|
|                  |                                      | Relevance                      | Designation to category | Clarity | Relevance                  | Coverage of content | Language Clarity |                                                                                                                     |
| 1                | Distress overall                     | good                           | NA                      | good    | good                       | covered             | good             |                                                                                                                     |
| <b>TREATMENT</b> |                                      |                                |                         |         |                            |                     |                  |                                                                                                                     |
| 2                | Treatment distress overall           | good                           | correct                 | good    | 0.57                       | not covered         | good             | 4 patients do not think of oxygen and / or medication → not adapted                                                 |
| 3                | Oxygen therapy                       | good                           | correct                 | good    | good                       | covered             | good             |                                                                                                                     |
| 4                | Inhalation                           | good                           | correct                 | good    | 0.00                       | covered             | good             |                                                                                                                     |
| 5                | Antibiotics / steroids               | 0.67                           | correct                 | good    | 0.29                       | covered             | good             |                                                                                                                     |
| 16               | Missing collaboration with care team | good                           | correct                 | good    | 0.75                       | covered             | good             |                                                                                                                     |
| 20               | Lack of physical activity            | good                           | 0.00                    | 0.70    | good                       | not covered         | good             | 4 patients understand daily items, e.g., 'household', but not 'training' → rephrased to 'lack of physical training' |
| <b>SYMPTOM</b>   |                                      |                                |                         |         |                            |                     |                  |                                                                                                                     |
| 6                | Coughing                             | good                           | correct                 | good    | 0.50                       | covered             | good             |                                                                                                                     |
| 7                | Phlegm                               | good                           | correct                 | 0.70    | good                       | covered             | good             |                                                                                                                     |
| 8                | Breathlessness                       | good                           | correct                 | good    | 0.67                       | covered             | good             |                                                                                                                     |
| 9                | Sleep disturbance                    | good                           | correct                 | good    | good                       | covered             | good             |                                                                                                                     |
| 10               | Pain                                 | good                           | correct                 | good    | good                       | covered             | good             |                                                                                                                     |
| 11               | Lack of energy                       | good                           | 0.67                    | good    | 0.60                       | covered             | good             |                                                                                                                     |
| 12               | Change in body weight                | good                           | 0.56                    | good    | 0.50                       | covered             | good             |                                                                                                                     |
| 13               | Incontinence urine                   | good                           | 0.56                    | good    | 0.75                       | covered             | not clear        | 3 patients did not understand 'incontinence' → rephrased to 'uncontrolled loss of urine'                            |

Table S1. Ratings of relevance, content allocation and clarity by clinicians (n=10) and patients (n=9)

|                                  |                                                 | Clinicians (n=10) QUANTITATIVE |                         |         | Patients (n=9) QUALITATIVE |                     |                  | Synthesis & Adaptation                                                                                                        |
|----------------------------------|-------------------------------------------------|--------------------------------|-------------------------|---------|----------------------------|---------------------|------------------|-------------------------------------------------------------------------------------------------------------------------------|
|                                  |                                                 | Relevance                      | Designation to category | Clarity | Relevance                  | Coverage of content | Language Clarity |                                                                                                                               |
| 14                               | Change in sexuality                             | good                           | 0.50                    | good    | 0.25                       | covered             | good             |                                                                                                                               |
| <b>UNPREDICTABILITY</b>          |                                                 |                                |                         |         |                            |                     |                  |                                                                                                                               |
| 15                               | Lack of knowledge                               | 0.7                            | correct                 | good    | good                       | covered             | good             |                                                                                                                               |
| 17                               | Threat due to progressing disease               | good                           | 0.63                    | good    | 0.33                       | covered             | good             |                                                                                                                               |
| 18                               | Lack of current control                         | good                           | 0.75                    | good    | good                       | covered             | good             |                                                                                                                               |
| 19                               | Lack of control in future                       | good                           | correct                 | good    | 0.75                       | covered             | good             | .                                                                                                                             |
| 33                               | No impact on health condition                   | good                           | correct                 | 0.78    | 0.50                       | covered             | good             |                                                                                                                               |
| 34                               | Inability to fulfil recommendations             | good                           | correct                 | good    | good                       | not covered         | good             | 2 patients do not understand what is meant → rephrased to '...recommendations regarding exercise, diet and smoking cessation' |
| <b>RESTRICTION IN DAILY LIFE</b> |                                                 |                                |                         |         |                            |                     |                  |                                                                                                                               |
| 21                               | Restriction in daily freedom                    | good                           | 0.75                    | good    | good                       | covered             | good             |                                                                                                                               |
| 22                               | Restriction in duties regarding work            | good                           | 0.75                    | good    | 0.75                       | covered             | good             | not relevant due to retirement → 'volunteering' added                                                                         |
| 23                               | Restriction in daily chores                     | good                           | 0.78                    | good    | good                       | covered             | good             |                                                                                                                               |
| 24                               | Restriction in self-care                        | good                           | 0.67                    | 0.70    | good                       | covered             | good             |                                                                                                                               |
| 25                               | Restriction in care for others (humans or pets) | good                           | correct                 | good    | 0.67                       | covered             | good             |                                                                                                                               |
| 26                               | Restriction in doing enjoyable things           | good                           | 0.44                    | good    | 0.50                       | covered             | good             |                                                                                                                               |
| 27                               | Not meeting own expectations                    | good                           | correct                 | good    | good                       | covered             | good             |                                                                                                                               |
| 28                               | Being lonely                                    | good                           | correct                 | good    | good                       | covered             | good             |                                                                                                                               |

Table S1. Ratings of relevance, content allocation and clarity by clinicians (n=10) and patients (n=9)

|    |                                        | Clinicians (n=10) QUANTITATIVE |                         |         | Patients (n=9) QUALITATIVE |                     |                  | Synthesis & Adaptation |
|----|----------------------------------------|--------------------------------|-------------------------|---------|----------------------------|---------------------|------------------|------------------------|
|    |                                        | Relevance                      | Designation to category | Clarity | Relevance                  | Coverage of content | Language Clarity |                        |
| 29 | Missing empathy                        | 0.70                           | 0.71                    | 0.70    | 0.67                       | covered             | good             |                        |
| 30 | Not meeting expectations of others     | good                           | correct                 | good    | good                       | covered             | good             |                        |
| 31 | Burdening others                       | good                           | 0.78                    | good    | 0.75                       | covered             | good             |                        |
| 32 | Unwanted attention                     | 0.60                           | 0.63                    | good    | good                       | covered             | good             |                        |
| 35 | Self-inflicted condition               | 0.56                           | 0.60                    | good    | 0.50                       | covered             | good             |                        |
| 36 | Others see condition as self-inflicted | 0.70                           | 0.71                    | 0.70    | 0.63                       | covered             | good             |                        |

Legend:

**Good / correct / covered:** The percentage of panellists who gave a favourable answer (3 = relevant / clear, 4 = very relevant / clear) or marked the corresponding category was  $\geq 0.8$ . As a total (100%), the number of panellists was counted who provided any answer (favourable / correct category; non-favourable / false category) for this item.

Table S2. Distribution of CRED-V1-Items

|                                                      |            | Not applicable | 0    | 1    | 2    | 3    | 4    | 5    | Missing |
|------------------------------------------------------|------------|----------------|------|------|------|------|------|------|---------|
| CRED-V1_1_General illness-related emotional distress | Frequency  | 0              | 22   | 46   | 55   | 69   | 50   | 21   | 1       |
|                                                      | Percentage | 0              | 8.3  | 17.4 | 20.8 | 26.1 | 18.9 | 8    | 0.4     |
| CRED-V1_2_Overall treatment distress                 | Frequency  | 0              | 69   | 49   | 55   | 63   | 14   | 8    | 6       |
|                                                      | Percentage | 0              | 26.1 | 18.6 | 20.8 | 23.9 | 5.3  | 3    | 2.3     |
| CRED-V1_3_Oxygen therapy                             | Frequency  | 130            | 33   | 30   | 28   | 27   | 10   | 5    | 1       |
|                                                      | Percentage | 49.2           | 12.5 | 11.4 | 10.6 | 10.2 | 3.8  | 1.9  | 0.4     |
| CRED-V1_4_Inhalation                                 | Frequency  | 60             | 75   | 54   | 33   | 22   | 15   | 0    | 5       |
|                                                      | Percentage | 22.7           | 28.4 | 20.5 | 12.5 | 8.3  | 5.7  | 0    | 1.9     |
| CRED-V1_5_Antibiotics / steroids                     | Frequency  | 130            | 56   | 26   | 25   | 11   | 9    | 5    | 2       |
|                                                      | Percentage | 49.2           | 21.2 | 9.8  | 9.5  | 4.2  | 3.4  | 1.9  | 0.8     |
| CRED-V1_6_Coughing                                   | Frequency  | 31             | 49   | 61   | 44   | 41   | 23   | 13   | 2       |
|                                                      | Percentage | 11.7           | 18.6 | 23.1 | 16.7 | 15.5 | 8.7  | 4.9  | 0.8     |
| CRED-V1_7_Phlegm                                     | Frequency  | 34             | 36   | 64   | 36   | 47   | 35   | 11   | 1       |
|                                                      | Percentage | 12.9           | 13.6 | 24.2 | 13.6 | 17.8 | 13.3 | 4.2  | 0.4     |
| CRED-V1_8_Breathlessness                             | Frequency  | 13             | 14   | 25   | 52   | 66   | 65   | 27   | 2       |
|                                                      | Percentage | 4.9            | 5.3  | 9.5  | 19.7 | 25   | 24.6 | 10.2 | 0.8     |
| CRED-V1_9_Sleep disturbance                          | Frequency  | 35             | 68   | 48   | 34   | 46   | 18   | 14   | 1       |
|                                                      | Percentage | 13.3           | 25.8 | 18.2 | 12.9 | 17.4 | 6.8  | 5.3  | 0.4     |
| CRED-V1_10_Pain                                      | Frequency  | 47             | 74   | 47   | 33   | 34   | 16   | 12   | 1       |
|                                                      | Percentage | 17.8           | 28   | 17.8 | 12.5 | 12.9 | 6.1  | 4.5  | 0.4     |

|                                                 |            | Not applicable | 0    | 1    | 2    | 3    | 4    | 5   | Missing |
|-------------------------------------------------|------------|----------------|------|------|------|------|------|-----|---------|
| CRED-V1_11_Lack of energy                       | Frequency  | 20             | 25   | 46   | 54   | 55   | 46   | 17  | 1       |
|                                                 | Percentage | 7.6            | 9.5  | 17.4 | 20.5 | 20.8 | 17.4 | 6.4 | 0.4     |
| CRED-V1_12_Change in body weight                | Frequency  | 44             | 76   | 40   | 32   | 34   | 21   | 16  | 1       |
|                                                 | Percentage | 16.7           | 28.8 | 15.2 | 12.1 | 12.9 | 8    | 6.1 | 0.4     |
| CRED-V1_13_Uncontrolled loss of urine           | Frequency  | 100            | 74   | 31   | 18   | 14   | 19   | 8   | 0       |
|                                                 | Percentage | 37.9           | 28   | 11.7 | 6.8  | 5.3  | 7.2  | 3   | 0       |
| CRED-V1_14_Change in sexuality                  | Frequency  | 79             | 70   | 29   | 19   | 28   | 22   | 13  | 4       |
|                                                 | Percentage | 29.9           | 26.5 | 11   | 7.2  | 10.6 | 8.3  | 4.9 | 1.5     |
| CRED-V1_15_Lack of knowledge                    | Frequency  | 76             | 93   | 46   | 24   | 15   | 4    | 4   | 2       |
|                                                 | Percentage | 28.8           | 35.2 | 17.4 | 9.1  | 5.7  | 1.5  | 1.5 | 0.8     |
| CRED-V1_16_Missing collaboration with care team | Frequency  | 54             | 119  | 46   | 25   | 12   | 6    | 1   | 1       |
|                                                 | Percentage | 20.5           | 45.1 | 17.4 | 9.5  | 4.5  | 2.3  | 0.4 | 0.4     |
| CRED-V1_17_Threat due to progressing disease    | Frequency  | 27             | 67   | 37   | 45   | 48   | 27   | 13  | 0       |
|                                                 | Percentage | 10.2           | 25.4 | 14   | 17   | 18.2 | 10.2 | 4.9 | 0       |
| CRED-V1_18_Lack of current control              | Frequency  | 36             | 57   | 37   | 41   | 51   | 30   | 10  | 2       |
|                                                 | Percentage | 13.6           | 21.6 | 14   | 15.5 | 19.3 | 11.4 | 3.8 | 0.8     |
| CRED-V1_19_Lack of control in future            | Frequency  | 26             | 41   | 42   | 37   | 45   | 50   | 21  | 2       |
|                                                 | Percentage | 9.8            | 15.5 | 15.9 | 14   | 17   | 18.9 | 8   | 0.8     |
| CRED-V1_20_Lack of physical training            | Frequency  | 26             | 37   | 46   | 50   | 52   | 39   | 13  | 1       |
|                                                 | Percentage | 9.8            | 14   | 17.4 | 18.9 | 19.7 | 14.8 | 4.9 | 0.4     |
| CRED-V1_21_Restriction in daily freedom         | Frequency  | 25             | 32   | 43   | 40   | 48   | 52   | 23  | 1       |
|                                                 | Percentage | 9.5            | 12.1 | 16.3 | 15.2 | 18.2 | 19.7 | 8.7 | 0.4     |

|                                                                  |            | Not applicable | 0    | 1    | 2    | 3    | 4    | 5   | Missing |
|------------------------------------------------------------------|------------|----------------|------|------|------|------|------|-----|---------|
| CRED-V1_22_Restriction in duties regarding work and volunteering | Frequency  | 118            | 47   | 21   | 23   | 15   | 21   | 15  | 4       |
|                                                                  | Percentage | 44.7           | 17.8 | 8    | 8.7  | 5.7  | 8    | 5.7 | 1.5     |
| CRED-V1_23_Restriction in daily chores                           | Frequency  | 53             | 63   | 35   | 31   | 34   | 32   | 15  | 1       |
|                                                                  | Percentage | 20.1           | 23.9 | 13.3 | 11.7 | 12.9 | 12.1 | 5.7 | 0.4     |
| CRED-V1_24_Restriction in self-care                              | Frequency  | 85             | 68   | 32   | 23   | 22   | 17   | 16  | 1       |
|                                                                  | Percentage | 32.2           | 25.8 | 12.1 | 8.7  | 8.3  | 6.4  | 6.1 | 0.4     |
| CRED-V1_25_Restriction in care for others                        | Frequency  | 81             | 64   | 28   | 29   | 22   | 22   | 17  | 1       |
|                                                                  | Percentage | 30.7           | 24.2 | 10.6 | 11   | 8.3  | 8.3  | 6.4 | 0.4     |
| CRED-V1_26_Restriction in doing enjoyable things                 | Frequency  | 36             | 37   | 32   | 48   | 30   | 49   | 29  | 3       |
|                                                                  | Percentage | 13.6           | 14   | 12.1 | 18.2 | 11.4 | 18.6 | 11  | 1.1     |
| CRED-V1_27_Not meeting own expectations                          | Frequency  | 33             | 48   | 38   | 51   | 36   | 32   | 25  | 1       |
|                                                                  | Percentage | 12.5           | 18.2 | 14.4 | 19.3 | 13.6 | 12.1 | 9.5 | 0.4     |
| CRED-V1_28_Being lonely                                          | Frequency  | 78             | 92   | 26   | 23   | 19   | 16   | 8   | 2       |
|                                                                  | Percentage | 29.5           | 34.8 | 9.8  | 8.7  | 7.2  | 6.1  | 3   | 0.8     |
| CRED-V1_29_Missing empathy                                       | Frequency  | 72             | 85   | 35   | 35   | 25   | 6    | 5   | 1       |
|                                                                  | Percentage | 27.3           | 32.2 | 13.3 | 13.3 | 9.5  | 2.3  | 1.9 | 0.4     |
| CRED-V1_30_Not meeting expectations of others                    | Frequency  | 52             | 72   | 33   | 41   | 30   | 23   | 9   | 4       |
|                                                                  | Percentage | 19.7           | 27.3 | 12.5 | 15.5 | 11.4 | 8.7  | 3.4 | 1.5     |
| CRED-V1_31_Burdening others                                      | Frequency  | 49             | 55   | 35   | 37   | 38   | 36   | 13  | 1       |
|                                                                  | Percentage | 18.6           | 20.8 | 13.3 | 14   | 14.4 | 13.6 | 4.9 | 0.4     |
| CRED-V1_32_Unwanted attention                                    | Frequency  | 55             | 89   | 43   | 29   | 24   | 16   | 7   | 1       |
|                                                                  | Percentage | 20.8           | 33.7 | 16.3 | 11   | 9.1  | 6.1  | 2.7 | 0.4     |

|                                                   |            | <b>Not applicable</b> | <b>0</b> | <b>1</b> | <b>2</b> | <b>3</b> | <b>4</b> | <b>5</b> | <b>Missing</b> |
|---------------------------------------------------|------------|-----------------------|----------|----------|----------|----------|----------|----------|----------------|
| CRED-V1_33_No impact on health condition          | Frequency  | 25                    | 41       | 53       | 39       | 39       | 33       | 30       | 4              |
|                                                   | Percentage | 9.5                   | 15.5     | 20.1     | 14.8     | 14.8     | 12.5     | 11.4     | 1.5            |
| CRED-V1_34_Inability to fulfil recommendations    | Frequency  | 66                    | 68       | 39       | 30       | 31       | 21       | 8        | 1              |
|                                                   | Percentage | 25                    | 25.8     | 14.8     | 11.4     | 11.7     | 8        | 3        | 0.4            |
| CRED-V1_35_Self-inflicted condition               | Frequency  | 29                    | 55       | 29       | 37       | 49       | 38       | 24       | 3              |
|                                                   | Percentage | 11                    | 20.8     | 11       | 14       | 18.6     | 14.4     | 9.1      | 1.1            |
| CRED-V1_36_Others see condition as self-inflicted | Frequency  | 47                    | 77       | 32       | 27       | 40       | 24       | 16       | 1              |
|                                                   | Percentage | 17.8                  | 29.2     | 12.1     | 10.2     | 15.2     | 9.1      | 6.1      | 0.4            |
